# Supplementary material
Source: PubMed Central journal article supplement (PMC3287229)
Supplement: JCI60282sd.pdf [file JCI60282sd.pdf]

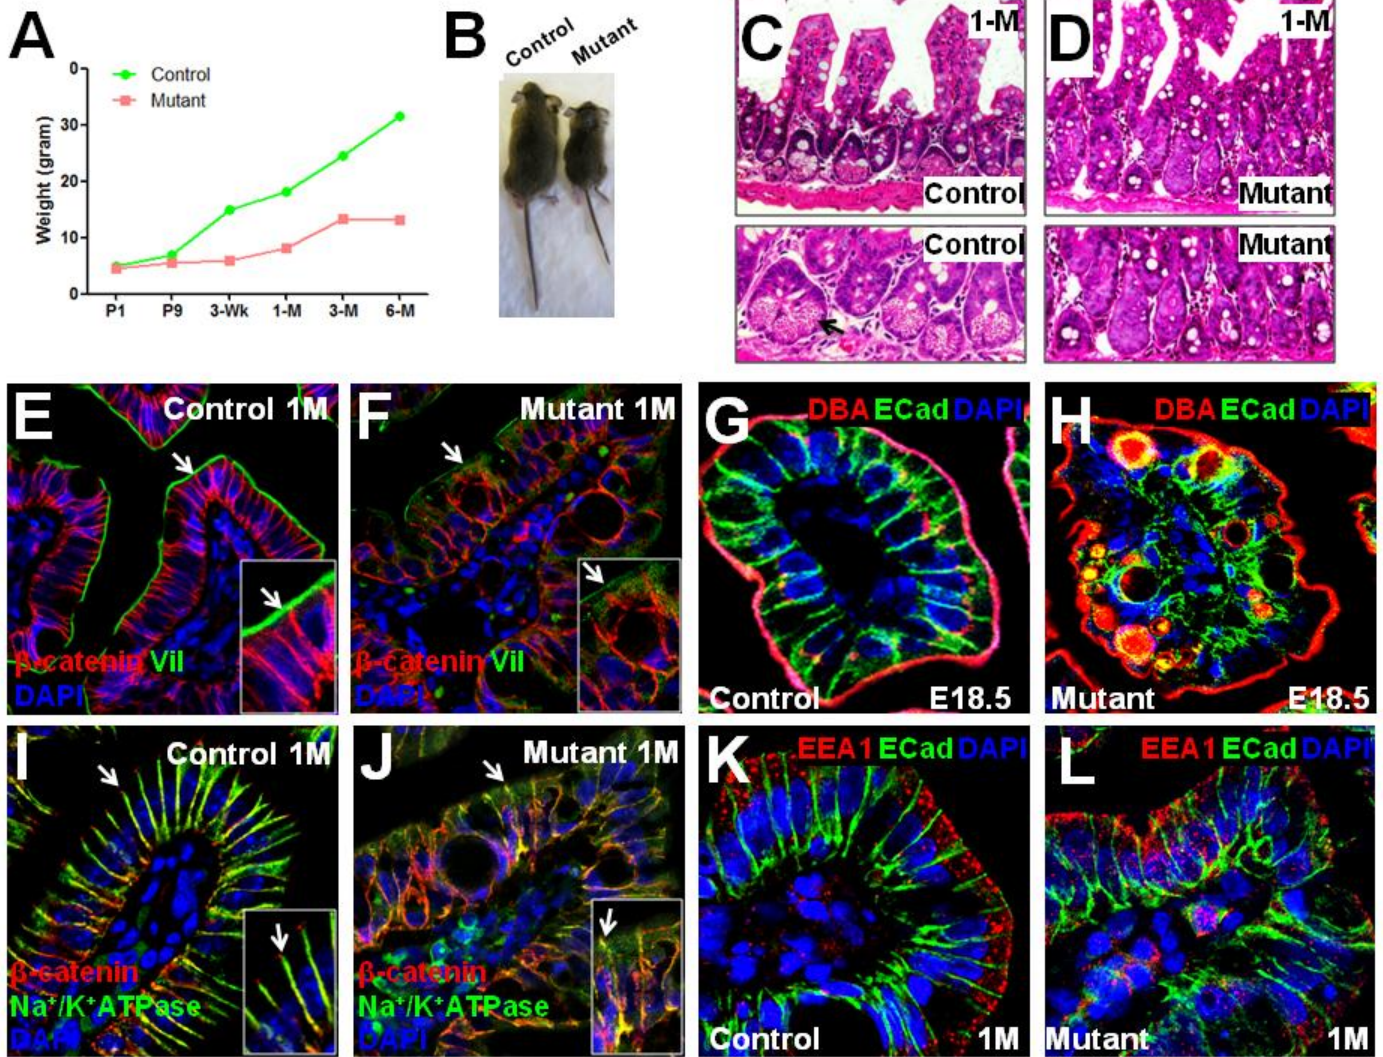

**Supplementary Figure 1. Growth retardation and intestinal abnormality in *Cdc42<sup>loxP/loxP</sup>; VillinCre* mice.**

(A) Growth curves of control and *Cdc42* mutant mice. (B) P15 control and mutant littermates. (C-D) H&E staining for one-month control and *Cdc42* mutant jejunum. Arrow in lower panel of C points to the typical Paneth cell granules present in control crypt. (E-F) Villin and E-cadherin staining of control and mutant jejunum. Arrows indicate brush borders. (G-H) DBA lectin and E-cadherin staining of control and mutant jejunum. (I-J)  $\text{Na}^+/\text{K}^+$ -ATPase and  $\beta$ -catenin staining of control and mutant jejunum. Arrows indicate tight junctions. (K-L) EEA1 and E-cadherin staining of control and mutant jejunum.

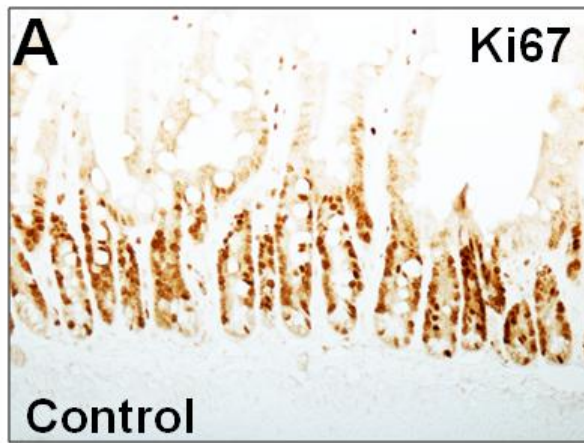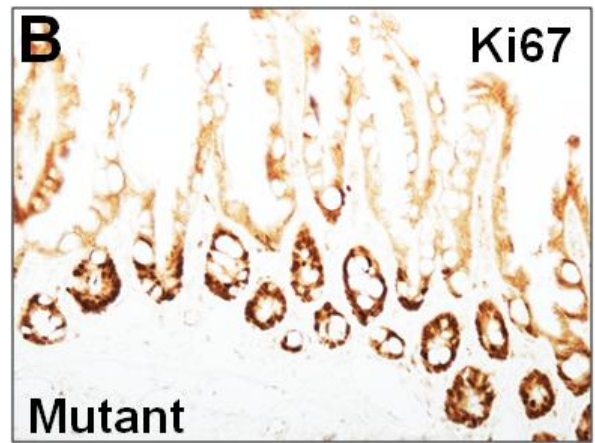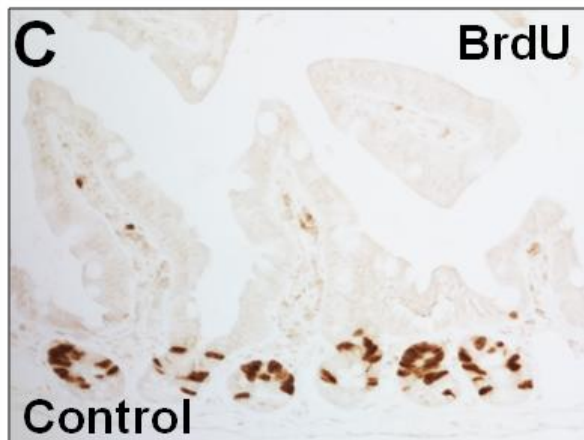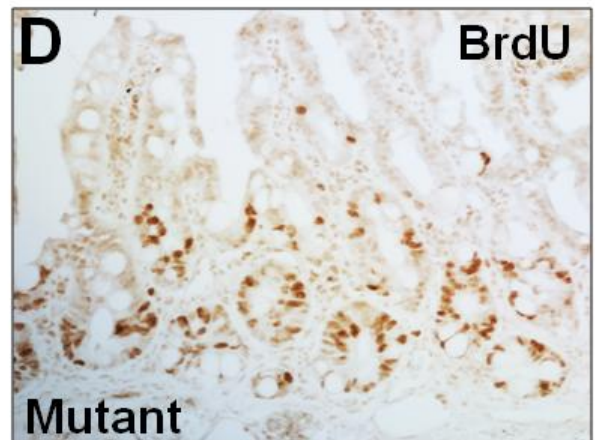

**Supplementary Figure 2. Affected stem/progenitor cell proliferation in Cdc42-mutant intestines.**

(A-B) Ki67 staining. (C-D) BrdU staining.

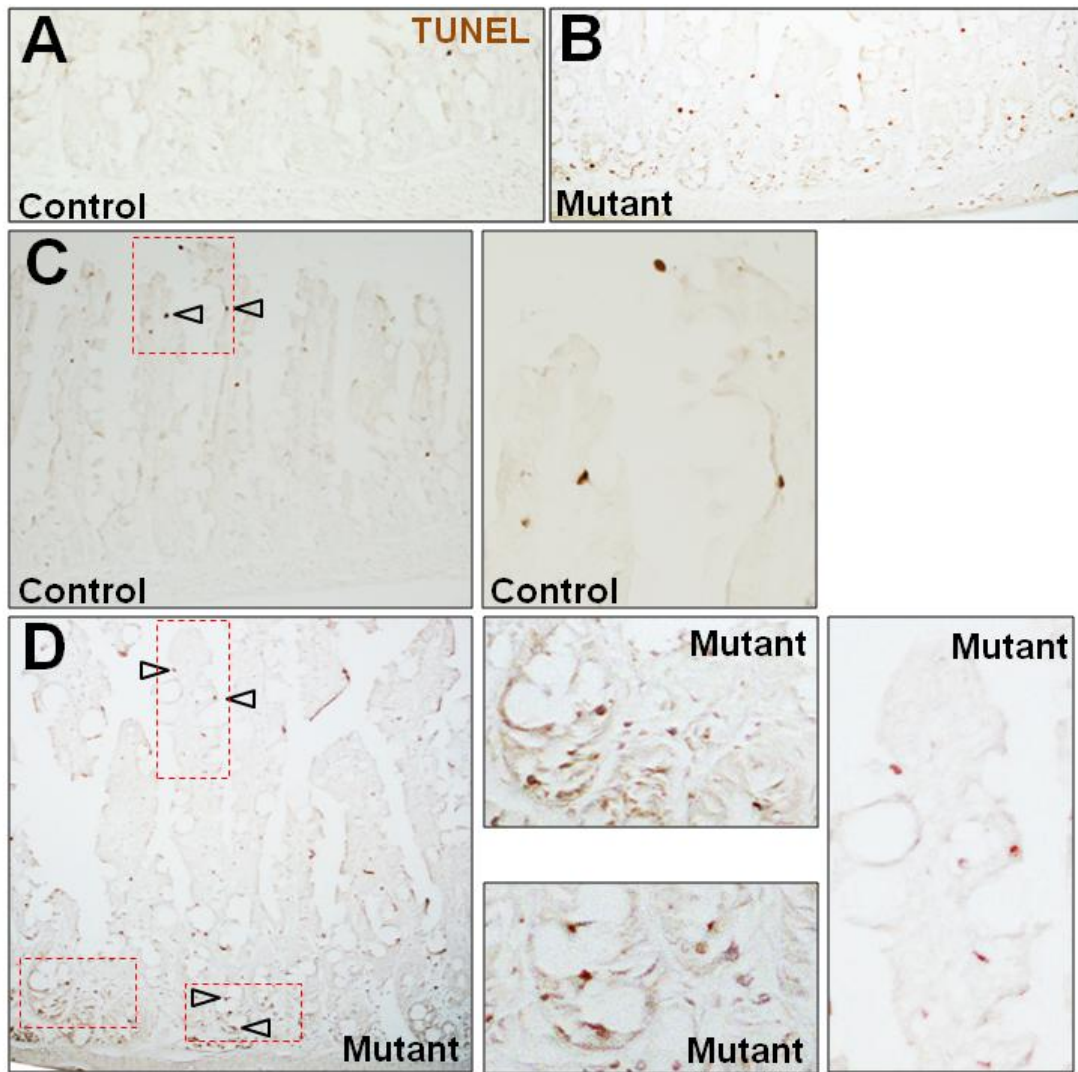

**Supplementary Figure 3. Increased apoptosis in *Cdc42* mutant intestinal crypts.**

(A-D) TUNEL staining. Arrowheads point to apoptotic cells in control villus tips in C, and mutant crypts and villi in D.



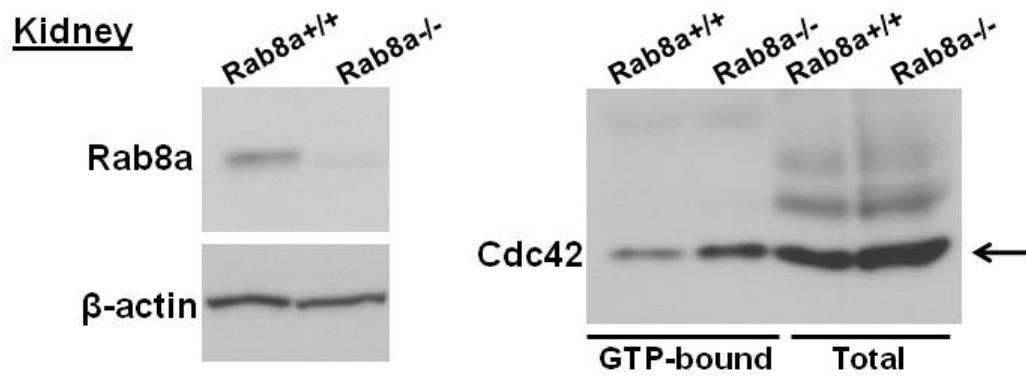

Supplementary Figure 4. Cdc42-GTP activity is not changed in Rab8a knockout kidney.

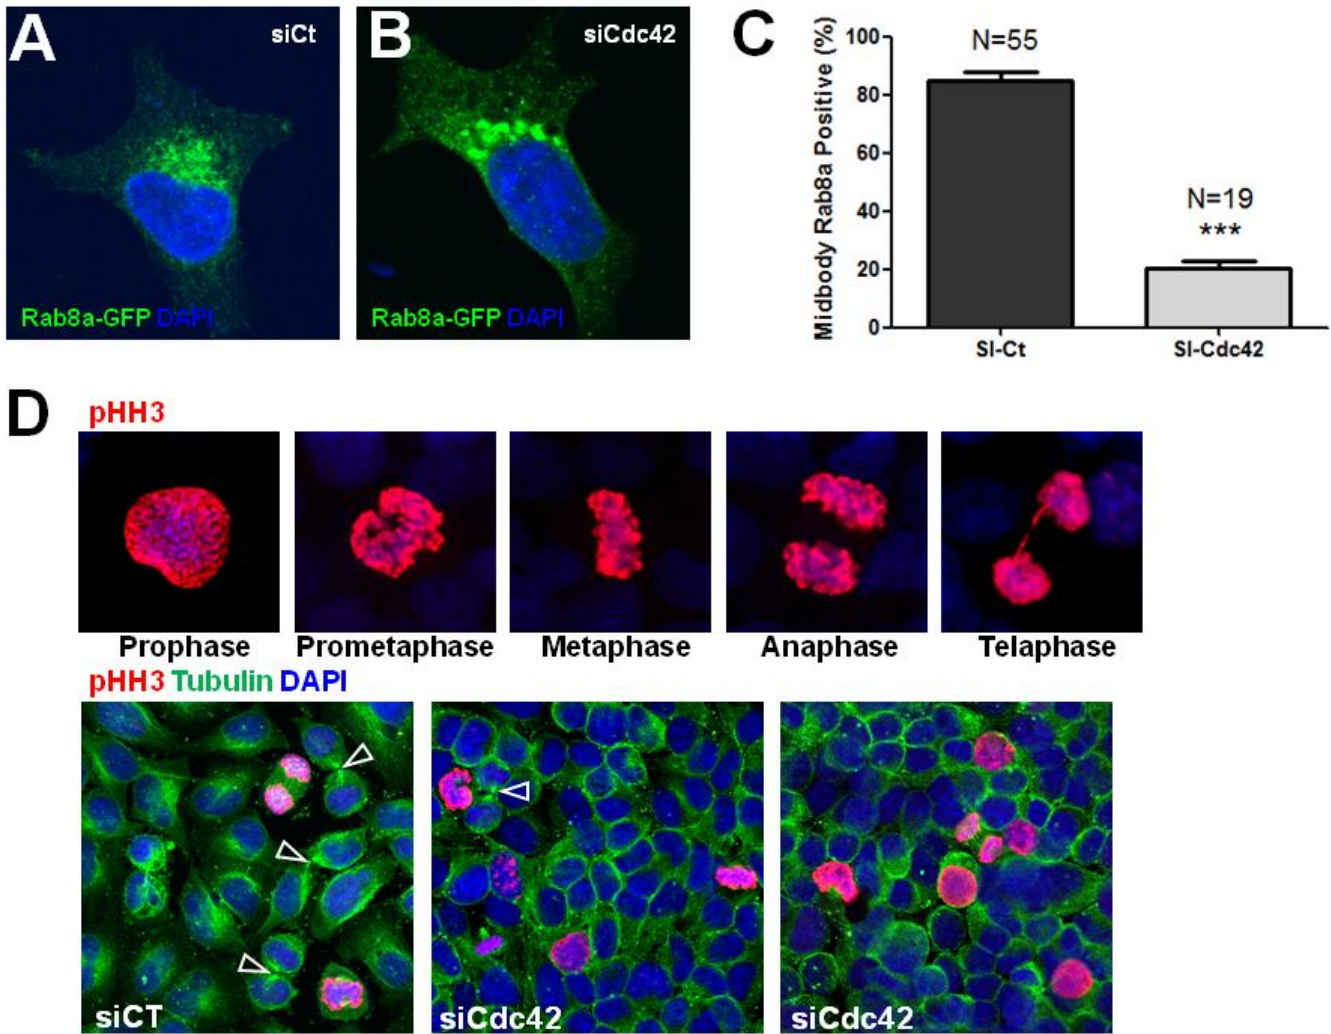

**Supplementary Figure 5. Cdc42-deficiency affects midbody-trafficking of Rab8a vesicles, impeding cytokinesis.**

(A-B) Rab8a-GFP distribution in live control and Cdc42 knockdown cells at interphase. (C) Quantification of Rab8a-GFP positive at midbody from three independent experiments. (D) pHH3 and Tubulin staining identify mitotic and cytokinetic events in control and Cdc42 knockdown cells.

## A. Control

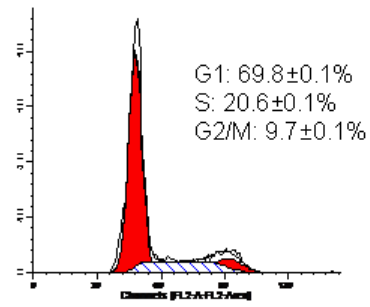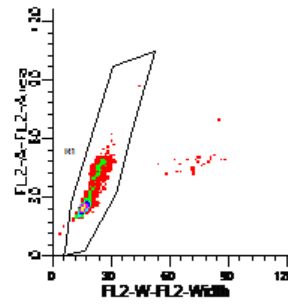

## B. 7 μM CASIN

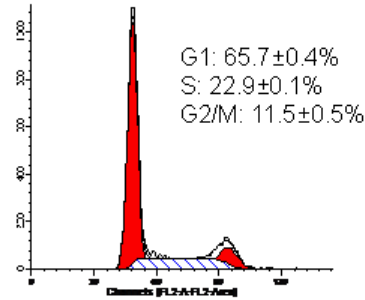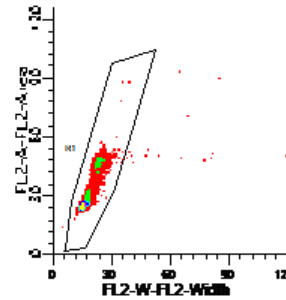

**Supplementary Figure 6. CASIN inhibition of Cdc42 induces G2/M accumulation.**

(A-B) FACS cell cycle analysis of control and 7 μM CASIN treated cells.

**A. Control**

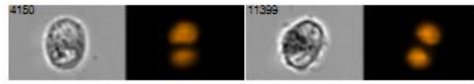

**B. Cdc42KD**

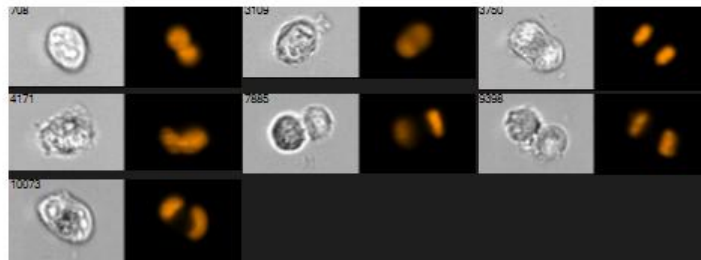

**C. 7  $\mu$ M CASIN**

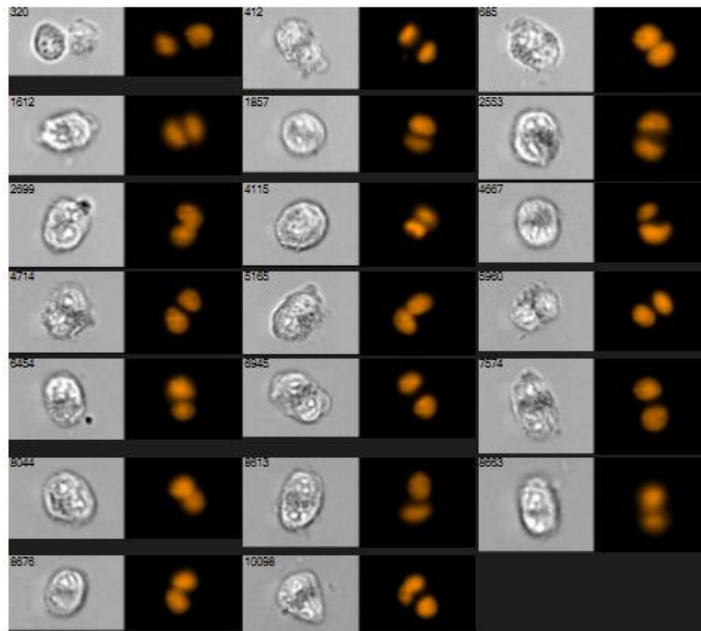

**Supplementary Figure 7. Cdc42 inhibition causes accumulation of cells at anaphase.**

(A-C) Imaging Flow Cytometry demonstrates increased anaphase counts in Cdc42 knockdown and 7  $\mu$ M CASIN treated cells.

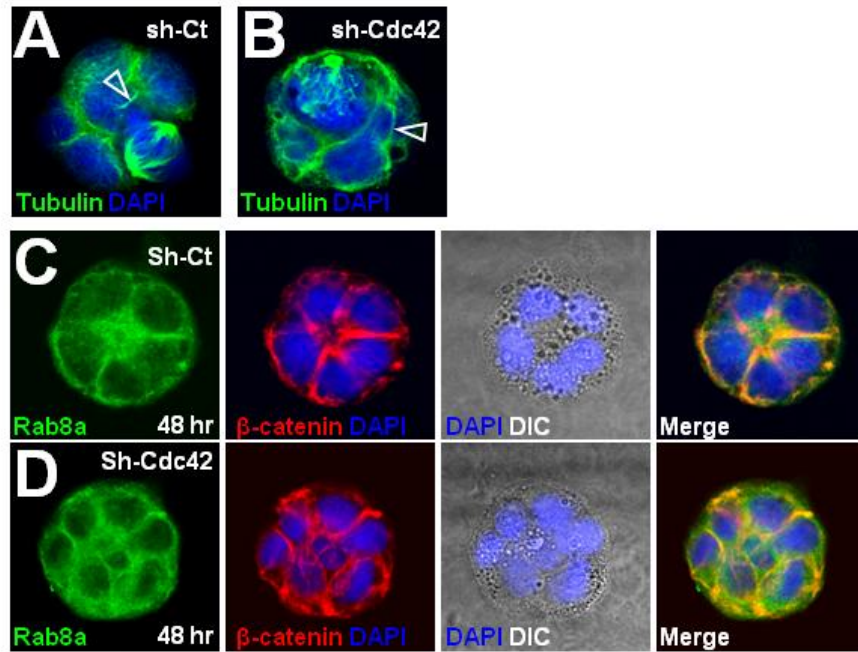

**Supplementary Figure 8. Cdc42-depletion disrupts Rab8a-vesicle traffic, midbody orientation and epithelial morphogenesis.**

(A-B) Tubulin staining in control and Cdc42-depleted Caco2 cysts. Arrowheads point to midbodies. Note that control midbody is positioned towards lumen. (C-D) Rab8a and  $\beta$ -catenin staining of control and Cdc42-depleted Caco2 cysts.



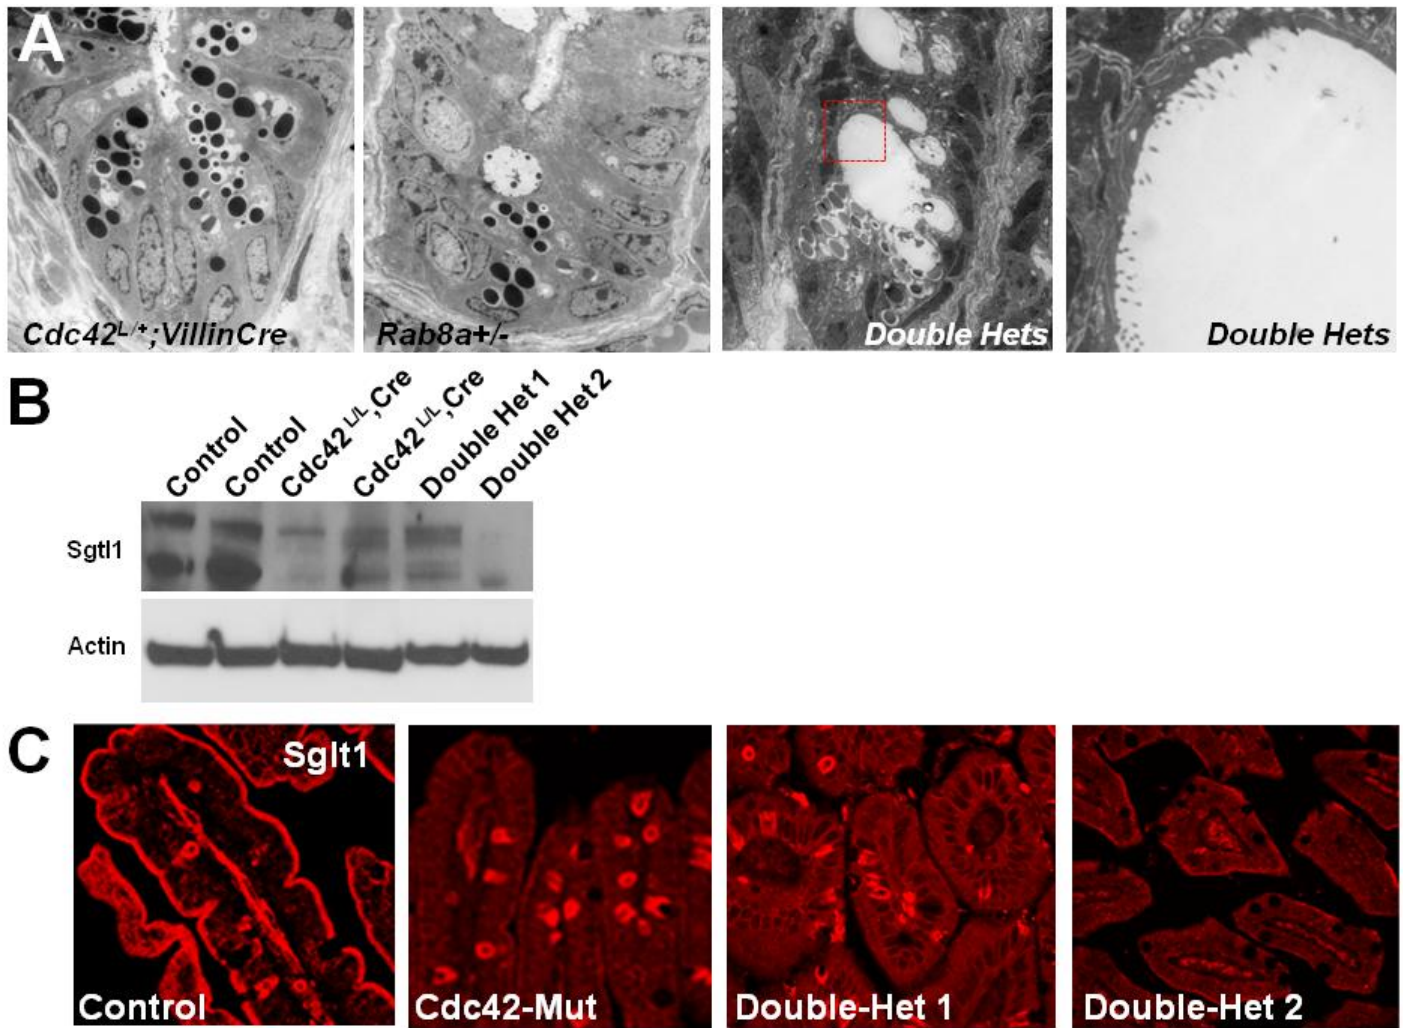

**Supplementary Figure 9. *Cdc42* and *Rab8a* double heterozygous intestines show abnormal crypt morphology and *SglT1* localization.**

(A) TEM graphs of control and double heterozygous mouse intestinal crypts. (B) Western blots for *SglT1*. (C) *SglT1* immunofluorescent staining in control, *Cdc42* mutant and double heterozygous mice. From B and C, please note that variability exists between different animals indicating a different disease penetrance.

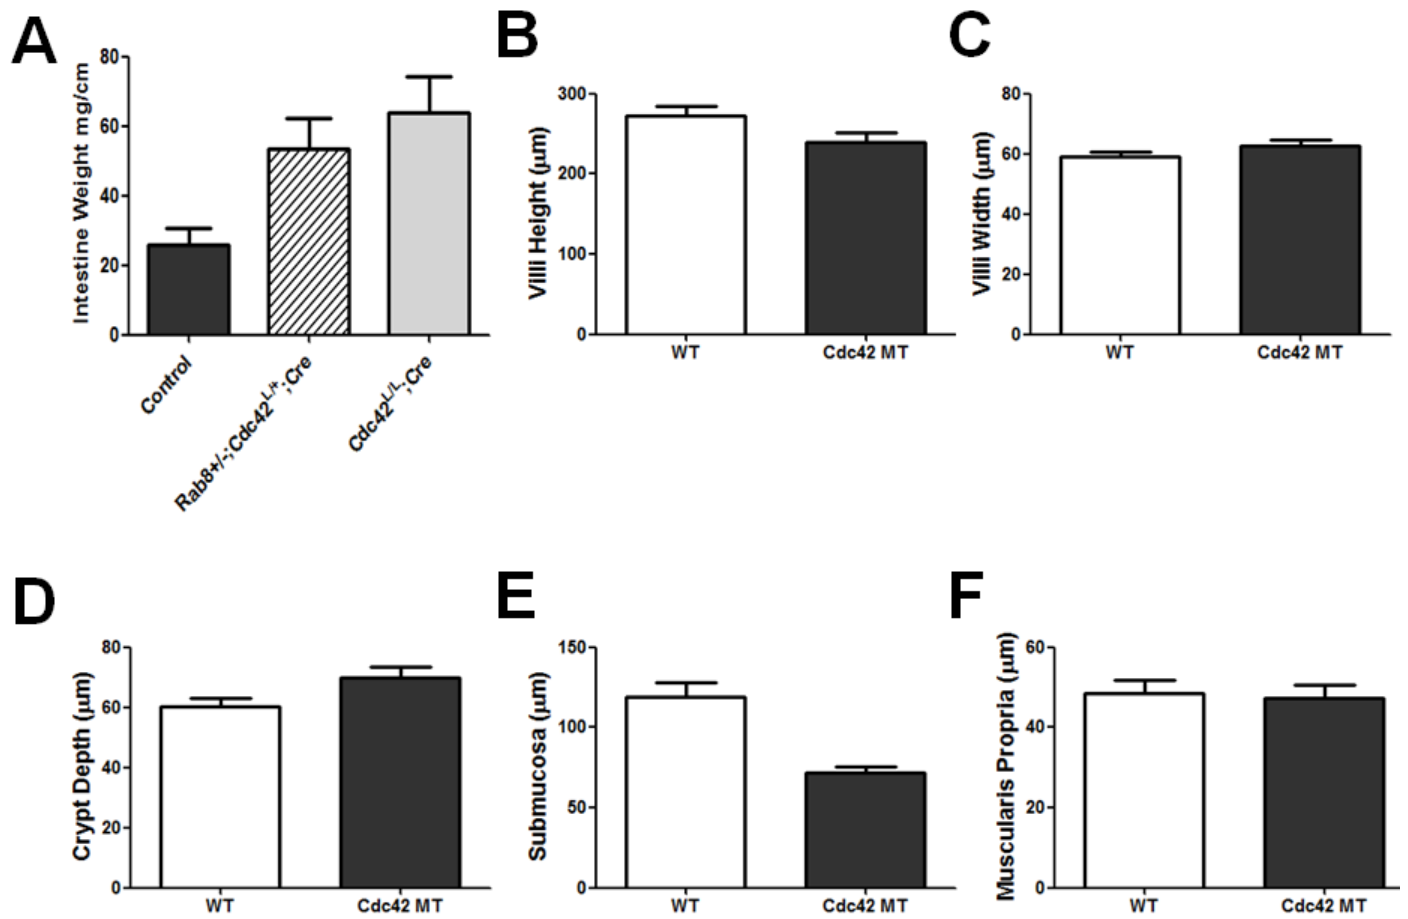

**Supplementary Figure 10. Cdc42 mutant and double heterozygous mice show increased intestinal weights indicating tissue edema.**

(A) Intestinal weight per surface area. (B-F) Morphometric analyses of intestinal villi height, width, crypt depth, submucosa and muscle thickness.

**Supplementary Table 1: Primer sequences for RT-PCR analyses.**

|               |   | Primer Sequence        |
|---------------|---|------------------------|
| <b>Lgr5</b>   | F | TAAAGACGACGGCAACAGTG   |
|               | R | GCCTTCAGGTCTTCCTCAA    |
| <b>Olfm4</b>  | F | TGAAGGAGATGCAAAAAGTGG  |
|               | R | CTCCAGCTTCTCTACCAAGAGG |
| <b>Bmi1</b>   | F | GAGCAGATTGGATCGGAAAG   |
|               | R | GCATCACAGTCATTGCTGCT   |
| <b>Msi1</b>   | F | ACTCCGGGGTCAGCAGTTAC   |
|               | R | GTGGTACCCATTGGTGAAGG   |
| <b>Hopx</b>   | F | AGCAGACGCAGAAATGGTTT   |
|               | R | TGGCTCCCTAGTCCGTAACA   |
| <b>Defa5</b>  | F | TATCTCCTTTGGAGGCCAAG   |
|               | R | TTTCTGCAGGTCCCAAAAAC   |
| <b>Lyz</b>    | F | TCAGATCAATAGCCGATACTGG |
|               | R | ATTGTATGGCTGCAGTGATGTC |
| <b>Mmp7</b>   | F | CTTACAAAGGACGACATTGCAG |
|               | R | AGTGCAGACCGTTTCTGTGAT  |
| <b>Pla2v5</b> | F | AACTGGAGGAAAAAGACTGTGC |
|               | R | ATTGGACAGAAGGAGTCGTGTT |
